# Supplementary material for: Conserved Evolution of MHC Supertypes among Japanese Frogs Suggests Selection for Bd Resistance
Source: MDPI journal article supplement (doi:10.3390/ani13132121), 2023-06-27
Supplement: s1 [file s1]

## Supplementary Tables and Figures

**Table S1.** Detailed summary of samples used for tissue collection to construct the transcriptome library. Transcriptome data for *Rana japonica*, *Rana ornativentris*, and *Rana tagoi tagoi* are from our previous study (Lau *et al.* 2017).

| Species                           | Source                                      | Sex | Date of capture/transfer to captivity |
|-----------------------------------|---------------------------------------------|-----|---------------------------------------|
| <i>Bufo japonicus</i>             | Shiwa, Hiroshima 34°47'N, 132°67'E          | M   | 2012/02/23                            |
| <i>Dryophytes japonicus</i>       | Kurose, Hiroshima 34°33'N, 132°66'E         | F   | 2004/07/02                            |
| <i>Fejervarya kawamurai</i>       | Mt. Futagami, Hiroshima 34°40'N, 132°70'E   | M   | Not recorded                          |
| <i>Glandirana rugosa</i>          | Takayama River, Hiroshima 34°53'N, 132°38'E | M   | 2011/07/14                            |
| <i>Pelophylax nigromaculatus</i>  | Kurose, Hiroshima 34°33'N, 132°66'E         | F   | 2009/07/02                            |
| <i>Pelophylax porosus porosus</i> | Kawashima-machi, Saitama 35°98'N, 139°49'E  | F   | 2009/06/28                            |
| <i>Buergeria buergeri</i>         | Uga, Hiroshima                              | F   | 2005/08/09                            |
| <i>Buergeria japonica</i>         | Shirahama, Iriomote 24°37'N, 123°77'E       | M   | Not recorded                          |

**Table S2.** Summary of MHC class I supertypes and accession numbers. Bold and bold-italics indicate variants from Japanese frogs collected in our present study and Lau *et al.* (2016), respectively.

| Supertype | MHC class I variants/alleles                                                                                                                                                                                                                                                                                                                                                                                                                                                                                                                                                                                                                                                                                           |
|-----------|------------------------------------------------------------------------------------------------------------------------------------------------------------------------------------------------------------------------------------------------------------------------------------------------------------------------------------------------------------------------------------------------------------------------------------------------------------------------------------------------------------------------------------------------------------------------------------------------------------------------------------------------------------------------------------------------------------------------|
| ST-A      | Agca-UA*02/04/05/11-14 [JQ679313/15/16/20/22-25]<br><b>Bfja-UA*02/03</b><br>Buga [KY302832/ KY302833]<br><b>Bubu-UA*01</b><br><b>Drja-UA*04</b><br>Drja* [KY302810/11/16]<br>Espr-UA*05/06/11/12 [JQ679335/36/41/42 ]<br><b>Feka-UA*04</b><br><b>Glu-UA*01</b><br>Lica-UA*07/10/11 [JQ679349/52/53]<br>Licl-UA*02-06/09/11/16 [JQ679356-60/63/65/70]<br><u>Liya-UA*01/03/07/08</u><br>Odma-UA*07-09 [MH784556-58]<br><b>Peni-UA*05</b><br>Poch-UA*05-07,09-10 [KX467508-10/12/13]<br>Pome-UA*02/04/05/07 [KC261638/40/41/43]<br><u>PSCO</u> [KX372230-34/38; KY072979]<br><u>Rapi</u> [AF185587.1]<br>Rhom-UA*01-02/04-05/12-13/16-18 [KC261644/45/47/48/55/56/59-61]<br>Smph-UA*01/02/04/06-11 [JQ679380/81/83/85-90] |
| ST-B      | Agca-UA*08 [JQ679319]<br><b>Bubu-UA*02-05</b><br><b>Buja-UA*01</b><br>Espr-UA*07 [ JQ679337]<br><b>Feka-UA*01-03</b><br><b>Glu-UA*02-05</b><br>Lica-UA*01-06/08/09/12 [JQ679343-48/50/51/54]<br>Licl-UA*01/07/08/10/12/15 [JQ679355/61/62/64/66-69]<br><u>Liya-UA*02/04-06/09</u><br>Odma-UA*01-06 [MH784550-55]<br><b>Peni-UA*01-04</b><br><b>Pepo-MHCI-UA*01-03</b><br>Poch-UA*08 [KX467511]<br>Pome-UA*01/03/04/06 [KC261637/39/40/42]<br><u>PSCO</u> [KX372241-42]<br><b>Raja-UA*01-10</b><br><b>Raor-UA*01-03/05-28</b><br><b>Rata-UA*01-22</b><br>Rhom-UA*03/06-11/14/15/19 [KC261646/49-54/57-58/62]                                                                                                            |
| ST-C      | Agca-UA*16-19 [JQ679327- JQ679330]<br>Espr-UA*01 [JQ679331]                                                                                                                                                                                                                                                                                                                                                                                                                                                                                                                                                                                                                                                            |
| ST-D      | Agca-UA*01/03/06/07/10 [JQ679312/14/17/18/21]<br><b>Bfja-UA*01</b><br>Buga [KY302834- KY302858]<br><b>Drja-UA*01-03,05-08</b><br>Drja* [KY302809/12-15/17-31]<br>Espr-UA*02-04,08-10 [JQ679332-4,8-10]<br>Smph-UA*03/05 [JQ679382/84]<br>Xela [AF185580/83; NM_001085732]                                                                                                                                                                                                                                                                                                                                                                                                                                              |

\*Korean population. Species that are reportedly susceptible to Bd are underlined. Species abbreviations: Agca - *Agalychnis callidryas*; Bfja - *Bufo japonicus*; Bubu - *Buergeria buergeri*; Buja - *Buergeria japonica*; Buga - *Bufo gargarizans*; Drja - *Dryophytes japonicus*; Espr - *Espadarana prosoblepon*; Feka - *Fejervarya kawamurai*; Glru - *Glandirana rugosa*; Lica - *Lithobates catesbeianus*; Licl - *Lithobates clamitans*; Odma - *Odorrana margaretae*; Peni - *Pelophylax nigromaculata*; Pepo - *Pelophylax porosus porosus*; Poch - *Rhacophorus chenfui*; Pome - *Polypedates megacephalus*; PSCO - *Pseudophryne corroboree*; Raja - *Rana*

*japonica*; Raor - *Rana ornativentris*; Rata - *Rana tagoi tagoi*; Rapi - *Rana pipiens*; Rhom - *Zhangixalus omeimontis*; Smph - *Smilisca phaeota*; Xela - *Xenopus laevis*.

**Table S3.** Summary of MHC class II supertypes and accession numbers. Bold and bold-italics indicate variants from Japanese frogs collected in our present study and previous study (Lau *et al.* 2017), respectively.

| Supertype | MHC class II variants/alleles                                                                                                                                                                                                                                                                                                                                                                                                                                                                                                                                                |
|-----------|------------------------------------------------------------------------------------------------------------------------------------------------------------------------------------------------------------------------------------------------------------------------------------------------------------------------------------------------------------------------------------------------------------------------------------------------------------------------------------------------------------------------------------------------------------------------------|
| ST-1      | <b>Bfja-01 – 03</b><br>Bfja [LC065651]<br>Boor-05 [KJ679329]<br>Buga-01 - 08 [KJ679317-24]<br><b>Buja-01/02</b><br><b>Bubu-01/02</b><br><b>Drja-01/04</b><br>Epca [HQ388288]<br><b>Feka-01/02</b><br><b>Glu-01/02</b><br>Lica [BT081564; transcriptome data from DRA accession number SRP051787]<br>Livea-1*/2*/3/3b*/11*/12/17/19/23 [KJ679288-91/304/05/10/12/16]<br>Napa-DRB1*15 [XM_018558121]<br><b>Peni-03</b><br><b>Pepo-01/02</b><br><b>Raja-01/02/04-06/08</b><br><b>Raor-04/07/08/11</b><br><b>Rata-01 -03/05 -11/13</b><br>RhmaDAB01/DBB01/DCB01 [KP995700/04/06] |
| ST-2      | Boor-02/06 [KJ679326/30]<br><b>Drja-02/03</b><br>Livea-4/6/7a/7b/9/10/15/18/20 [KJ679292/97/98/99/302/03/08/11/13]<br><b>Raja-03/07/09</b><br><b>Raor-01-03/05/06/09/10</b><br><b>Rata-04/12</b><br>Xetr [NP001039259], Xela [D13684, D13688]                                                                                                                                                                                                                                                                                                                                |
| ST-3      | Rhom(Zhom) [KT276421/23/25/28/34/35/43/44/52/53/62/64/72/75/83/84]<br>Ly1-32/40-42/79-80 [KU877031-62/70-72/107-108]                                                                                                                                                                                                                                                                                                                                                                                                                                                         |
| ST-4      | Boor-01/03/04/07 [KJ679325/27/28/31]<br>Livea-5a*/5b*/5c/5d/8a/8b/13*/14*/16/21/22 [KJ679293-96/300/01/06/07/09/14/15]<br>Ly33-39/43-78 [KU877064-69/73-106]<br><b>Peni-01/02</b><br>Rhom [KT276499/505/08/10]                                                                                                                                                                                                                                                                                                                                                               |
| ST-5      | Qusp [KJ082083]<br>Rhom(Zhom) [KT276411-20/22/24/26/29-33/36-38/40/41/45-51/54-61/63/65-71/73/74/76-82/85-98/500-04/06/07/09/11/12]                                                                                                                                                                                                                                                                                                                                                                                                                                          |

Additional abbreviations: Qusp - *Quasipaa spinosa*, Boor - *Bombina orientalis*, Rhma - *Rhinella marina*, Napa - *Nanorana parkeri*, Livea - *Litoria verreauxii alpina*, Epca - *Epidalea calamita*. \*MHC-II alleles from Livea suggested to be ‘resistant’ to Bd (Bataille *et al.* 2015). See Table S2 for other species abbreviations. Ly is equivalent to Liya [*Lithobates yavapaiensis*].

**Table S4.** List of peptides used for MHC binding prediction. A combined set of Bd-related proteins were analyzed (A), including three Bd-related antigens [70 kDa heat shock protein 3, 26S protease regulatory subunit 6A-B, and JEL423 surface antigen], and proteins of M36, S41, ASP, adhesion, CRN, and lipase3 genes with increased expression after Bd was inoculated in frog skin (Rosenblum *et al.* 2012). In addition, as a control, we examined (B) a set of 13 immunogenic antigens from human fungal pathogen, *Aspergillus fumigatus* (Bacher *et al.* 2014) (i.e. non-Bd-related antigens) and (C) a set of 7 antigens from *Escherichia coli* bacteria (i.e. non-fungal antigens). Full list of compiled peptide sequences (before and after protein cleavage) is available upon request.

| Dataset/proteins                                                                                     | Accession number/<br>Locus tag | Original<br>length (aa) | No. of 15-24 amino acid-long<br>peptides after protein cleavage |
|------------------------------------------------------------------------------------------------------|--------------------------------|-------------------------|-----------------------------------------------------------------|
| <b>(A) Bd-related proteins and proteins with increased expression when Bd was grown in frog skin</b> |                                |                         | Total =644                                                      |
| 70 kDa heat shock protein 3                                                                          | XP_006675784                   | 647                     | 6                                                               |
| 26S protease regulatory subunit 6A-B                                                                 | XP_006680816                   | 434                     | 3                                                               |
| JEL423 surface antigen                                                                               | OAJ39392                       | 449                     | 4                                                               |
| M36 (metallo-proteases)                                                                              | BATDEDRAFT_11205               | 450                     | 2                                                               |
|                                                                                                      | BATDEDRAFT_1502                | 300                     | 0                                                               |
|                                                                                                      | BATDEDRAFT_16613               | 289                     | 3                                                               |
|                                                                                                      | BATDEDRAFT_1489                | 300                     | 1                                                               |
|                                                                                                      | BATDEDRAFT_1469                | 300                     | 0                                                               |
|                                                                                                      | BATDEDRAFT_12637               | 413                     | 1                                                               |
|                                                                                                      | BATDEDRAFT_1639                | 404                     | 3                                                               |
| S41 (serine-proteases)                                                                               | BATDEDRAFT_85649               | 883                     | 11                                                              |
|                                                                                                      | BATDEDRAFT_36653               | 100                     | 0                                                               |
|                                                                                                      | BATDEDRAFT_23534               | 640                     | 6                                                               |
|                                                                                                      | BATDEDRAFT_23310               | 883                     | 12                                                              |
|                                                                                                      | BATDEDRAFT_23544               | 705                     | 8                                                               |
|                                                                                                      | BATDEDRAFT_24207               | 843                     | 9                                                               |
|                                                                                                      | BATDEDRAFT_24208               | 322                     | 3                                                               |
|                                                                                                      | BATDEDRAFT_24156               | 885                     | 11                                                              |
|                                                                                                      | BATDEDRAFT_87928               | 571                     | 8                                                               |
|                                                                                                      | BATDEDRAFT_24985               | 928                     | 10                                                              |
|                                                                                                      | BATDEDRAFT_25462               | 629                     | 6                                                               |
|                                                                                                      | BATDEDRAFT_35365               | 885                     | 10                                                              |
|                                                                                                      | BATDEDRAFT_90146               | 883                     | 10                                                              |
|                                                                                                      | BATDEDRAFT_26287               | 643                     | 6                                                               |
|                                                                                                      | BATDEDRAFT_27937               | 882                     | 8                                                               |
|                                                                                                      | BATDEDRAFT_92476               | 577                     | 8                                                               |
| ASP (aspartyl-proteases)                                                                             | BATDEDRAFT_21660               | 480                     | 5                                                               |
|                                                                                                      | BATDEDRAFT_22611               | 503                     | 5                                                               |
|                                                                                                      | BATDEDRAFT_22623               | 476                     | 3                                                               |
|                                                                                                      | BATDEDRAFT_86720               | 475                     | 4                                                               |
|                                                                                                      | BATDEDRAFT_23192               | 491                     | 5                                                               |
|                                                                                                      | BATDEDRAFT_23275               | 525                     | 6                                                               |
|                                                                                                      | BATDEDRAFT_87177               | 423                     | 5                                                               |
|                                                                                                      | BATDEDRAFT_87185               | 476                     | 8                                                               |
|                                                                                                      | BATDEDRAFT_87250               | 475                     | 10                                                              |
|                                                                                                      | BATDEDRAFT_23765               | 503                     | 7                                                               |
|                                                                                                      | BATDEDRAFT_87859               | 389                     | 3                                                               |
|                                                                                                      | BATDEDRAFT_87892               | 472                     | 7                                                               |
|                                                                                                      | BATDEDRAFT_88273               | 481                     | 4                                                               |
|                                                                                                      | BATDEDRAFT_24300               | 476                     | 7                                                               |

|               |                  |     |   |
|---------------|------------------|-----|---|
|               | BATDEDRAFT_24380 | 492 | 6 |
|               | BATDEDRAFT_24760 | 490 | 5 |
|               | BATDEDRAFT_24767 | 487 | 3 |
|               | BATDEDRAFT_25148 | 477 | 4 |
|               | BATDEDRAFT_25666 | 491 | 6 |
|               | BATDEDRAFT_36999 | 302 | 3 |
|               | BATDEDRAFT_89345 | 469 | 6 |
|               | BATDEDRAFT_25259 | 509 | 6 |
|               | BATDEDRAFT_89380 | 431 | 5 |
|               | BATDEDRAFT_25355 | 541 | 7 |
|               | BATDEDRAFT_89821 | 477 | 2 |
|               | BATDEDRAFT_25680 | 384 | 6 |
|               | BATDEDRAFT_25784 | 418 | 2 |
|               | BATDEDRAFT_89959 | 458 | 5 |
|               | BATDEDRAFT_26088 | 379 | 5 |
|               | BATDEDRAFT_26151 | 476 | 6 |
|               | BATDEDRAFT_26132 | 482 | 9 |
|               | BATDEDRAFT_90236 | 179 | 2 |
|               | BATDEDRAFT_90237 | 241 | 3 |
|               | BATDEDRAFT_26134 | 476 | 4 |
|               | BATDEDRAFT_90267 | 476 | 3 |
|               | BATDEDRAFT_26425 | 477 | 7 |
|               | BATDEDRAFT_90625 | 478 | 4 |
|               | BATDEDRAFT_26741 | 477 | 5 |
|               | BATDEDRAFT_35725 | 441 | 6 |
|               | BATDEDRAFT_90888 | 375 | 4 |
|               | BATDEDRAFT_26762 | 473 | 9 |
|               | BATDEDRAFT_26758 | 464 | 5 |
|               | BATDEDRAFT_26748 | 452 | 5 |
|               | BATDEDRAFT_90978 | 400 | 6 |
|               | BATDEDRAFT_91075 | 405 | 7 |
|               | BATDEDRAFT_27277 | 475 | 7 |
|               | BATDEDRAFT_27069 | 484 | 3 |
|               | BATDEDRAFT_27286 | 399 | 7 |
|               | BATDEDRAFT_92020 | 471 | 5 |
|               | BATDEDRAFT_27966 | 488 | 5 |
|               | BATDEDRAFT_28166 | 469 | 5 |
|               | BATDEDRAFT_28328 | 487 | 8 |
|               | BATDEDRAFT_28256 | 490 | 4 |
|               | BATDEDRAFT_92488 | 442 | 6 |
|               | BATDEDRAFT_92592 | 475 | 2 |
|               | BATDEDRAFT_28513 | 478 | 5 |
|               | BATDEDRAFT_92740 | 212 | 4 |
|               | BATDEDRAFT_28541 | 559 | 7 |
|               | BATDEDRAFT_28537 | 400 | 6 |
|               | BATDEDRAFT_28684 | 484 | 9 |
| Adhesin genes | BATDEDRAFT_84886 | 149 | 0 |
|               | BATDEDRAFT_22355 | 363 | 5 |
|               | BATDEDRAFT_21697 | 569 | 4 |
|               | BATDEDRAFT_85835 | 303 | 2 |
|               | BATDEDRAFT_85893 | 302 | 6 |
|               | BATDEDRAFT_22768 | 376 | 0 |
|               | BATDEDRAFT_87248 | 379 | 6 |
|               | BATDEDRAFT_87422 | 284 | 1 |
|               | BATDEDRAFT_23878 | 345 | 6 |
|               | BATDEDRAFT_87864 | 324 | 3 |
|               | BATDEDRAFT_87929 | 340 | 1 |
|               | BATDEDRAFT_11071 | 328 | 3 |
|               | BATDEDRAFT_90520 | 323 | 6 |

|                                                         |                  |     |           |
|---------------------------------------------------------|------------------|-----|-----------|
|                                                         | BATDEDRAFT_27092 | 457 | 0         |
|                                                         | BATDEDRAFT_27091 | 663 | 3         |
|                                                         | BATDEDRAFT_28554 | 993 | 9         |
|                                                         | BATDEDRAFT_93124 | 563 | 2         |
| CRN (crinkler-like effectors)                           | BATDEDRAFT_84882 | 596 | 6         |
|                                                         | BATDEDRAFT_85109 | 603 | 6         |
|                                                         | BATDEDRAFT_86517 | 222 | 1         |
|                                                         | BATDEDRAFT_31422 | 673 | 9         |
|                                                         | BATDEDRAFT_23217 | 281 | 1         |
|                                                         | BATDEDRAFT_87221 | 806 | 9         |
|                                                         | BATDEDRAFT_87524 | 769 | 8         |
|                                                         | BATDEDRAFT_24811 | 671 | 6         |
|                                                         | BATDEDRAFT_37012 | 765 | 9         |
|                                                         | BATDEDRAFT_26085 | 458 | 4         |
|                                                         | BATDEDRAFT_26137 | 671 | 7         |
|                                                         | BATDEDRAFT_90343 | 561 | 6         |
|                                                         | BATDEDRAFT_90726 | 354 | 2         |
|                                                         | BATDEDRAFT_26749 | 780 | 8         |
|                                                         | BATDEDRAFT_28183 | 721 | 8         |
| Lipase-3 encoding genes                                 | BATDEDRAFT_86691 | 407 | 4         |
|                                                         | BATDEDRAFT_86693 | 323 | 3         |
|                                                         | BATDEDRAFT_89307 | 261 | 2         |
|                                                         | BATDEDRAFT_26489 | 250 | 2         |
|                                                         | BATDEDRAFT_26490 | 376 | 6         |
|                                                         | BATDEDRAFT_26491 | 470 | 7         |
|                                                         | BATDEDRAFT_93190 | 284 | 3         |
|                                                         | BATDEDRAFT_93191 | 375 | 3         |
| <b>(B) Single <i>A. fumigatus</i> proteins</b>          |                  |     | Total: 49 |
| Scw4 (Cell wall glucanase)                              | AFUA_6G12380     | 369 | 2         |
| Gel1 (1,3- $\beta$ -glucanosyltransferase)              | AFUA_2G01170     | 452 | 7         |
| Crf1/Aspf9 (Cell wall glucanase)                        | AFUA_1G16190     | 395 | 2         |
| Pst1 (GPI-anchored cell wall protein)                   | AFUA_6G10290     | 406 | 8         |
| Sod3/Aspf6 (Manganese superoxide dismutase)             | AFUA_1G14550     | 210 | 3         |
| Shm2 (Serine hydroxymethyltransferase)                  | AFUA_3G09320     | 471 | 2         |
| Aspf2 (Allergen, expressed in zinc-limiting conditions) | AFUA_4G09580     | 310 | 3         |
|                                                         | AFUA_4G13170     | 316 | 5         |
| CpcB (RACK1 ortholog)                                   | AFUA_5G13450     | 256 | 3         |
| TpiA (Triosephosphate isomerase)                        | AFUA_6G02280     | 438 | 3         |
| Aspf3 (Peroxiredoxin family reductase)                  | AFUA_6G09740     | 334 | 3         |
| GliT (Gliotoxin oxidase)                                | AFUA_3G02270     | 728 | 3         |
| CatB (Catalase B)                                       | AFUA_1G04130     | 307 | 5         |
| FG-GAP (FG-GAP repeat protein)                          |                  |     |           |
| <b>(C) <i>E. coli</i> proteins</b>                      |                  |     | Total: 24 |
| Surface antigen                                         | SYX50777.1       | 179 | 1         |
| clpG surface antigen                                    | AAA23585.1       | 278 | 1         |
| Surface antigen                                         | EFX23024.1       | 577 | 7         |
| Capsular polysaccharide                                 | ALY13557.1       | 540 | 8         |
| Capsular polysaccharide                                 | GCO29334.1       | 248 | 4         |
| Lipopolysaccharide 1,2-glucosyltransferase RfaJ         | WP_032226820.1   | 338 | 3         |

**Table S5.** Nucleotide lengths of mitochondrial gene sequence collated from published and transcriptomic data. These sequences were concatenated to generate the species phylogeny shown in Figure 3.

| Species name                            | GenBank ID of mitochondrial genome | Nucleotide length |     |      |      |      |     |      |      |      |      |      |      | Concatenated nucleotide length |
|-----------------------------------------|------------------------------------|-------------------|-----|------|------|------|-----|------|------|------|------|------|------|--------------------------------|
|                                         |                                    | ND1               | ND3 | ND4  | ND4L | ND5  | ND6 | COX1 | COX2 | COX3 | ATP6 | ATP8 | CYTB |                                |
| <i>Alytes obstetricans pertinax</i>     | NC_006688.1                        | 960               | 342 | 1377 | 294  | 1806 | 507 | 1548 | 687  | 783  | 681  | 165  | 1140 | 10290                          |
| <i>Andrias davidianus</i>               | NC_004926.1                        | 969               | 348 | 1374 | 294  | 1809 | 516 | 1548 | 687  | 783  | 681  | 165  | 1140 | 10314                          |
| <i>Ascaphus truei</i>                   | AJ871087.1                         | 969               | 348 | 1371 | 294  | 1800 | 507 | 1548 | 687  | 783  | 681  | 165  | 1140 | 10293                          |
| <i>Bombina fortinuptialis</i>           | NC_006402.1                        | 960               | 342 | 1377 | 294  | 1806 | 507 | 1551 | 687  | 783  | 681  | 165  | 1140 | 10293                          |
| <i>Bombina maxima</i>                   | NC_011049.1                        | 960               | 339 | 1377 | 294  | 1806 | 546 | 1551 | 687  | 783  | 681  | 165  | 1140 | 10329                          |
| <i>Bombina orientalis</i>               | NC_006689.1                        | 960               | 342 | 1377 | 294  | 1806 | 507 | 1551 | 687  | 783  | 681  | 165  | 1140 | 10293                          |
| <i>Bombina variegata</i>                | NC_009258.1                        | 960               | 342 | 1377 | 294  | 1806 | 507 | 1551 | 687  | 783  | 681  | 165  | 1140 | 10293                          |
| <b><i>Buergeria buergeri</i></b>        | AB127977.1                         | 963               | 342 | 1365 | 282  | 1788 | 489 | 1548 | 684  | 783  | 681  | 162  | 1167 | 10254                          |
| <i>Bufo gargarizans</i>                 | NC_008410.1                        | 960               | 339 | 1362 | 297  | 1788 | 492 | 1539 | 687  | 783  | 681  | 162  | 1143 | 10233                          |
| <i>Bufo melanostictus</i>               | NC_005794.2                        | 960               | 339 | 1362 | 297  | 1788 | 492 | 1539 | 687  | 783  | 681  | 162  | 1143 | 10233                          |
| <i>Discoglossus galganoi</i>            | NC_006690.1                        | 963               | 342 | 1377 | 294  | 1815 | 507 | 1551 | 687  | 783  | 681  | 165  | 1140 | 10305                          |
| <i>Euphylyctis hexadactylus</i>         | NC_014584.1                        | 960               | 339 | 1353 | 279  | 1845 | 483 | 1548 | 678  | 783  | 681  | 159  | 1140 | 10248                          |
| <i>Fejervarya cancrivora</i>            | NC_012647.1                        | 954               | 342 | 1359 | 276  | 1803 | 486 | 1533 | 681  | 783  | 681  | 162  | 1134 | 10194                          |
| <i>Fejervarya limnocharis</i>           | NC_005055.1                        | 957               | 342 | 1350 | 276  | 1800 | 486 | 1533 | 681  | 783  | 681  | 159  | 1134 | 10182                          |
| <i>Glandirana emeljanovi</i>            | KF771343.1                         | 960               | 339 | 1359 | 282  | 1788 | 495 | 1548 | 687  | 783  | 681  | 162  | 1140 | 10224                          |
| <b><i>Glandirana rugosa</i></b>         | KF771341.1                         | 960               | 339 | 1359 | 282  | 1788 | 495 | 1548 | 687  | 783  | 681  | 162  | 1140 | 10224                          |
| <i>Glandirana tientaiensis</i>          | KF771342.1                         | 960               | 339 | 1359 | 282  | 1788 | 492 | 1548 | 687  | 783  | 681  | 162  | 1140 | 10221                          |
| <b><i>Bufo japonicus</i></b>            | NC_009886.1                        | 960               | 339 | 1362 | 297  | 1800 | 492 | 1539 | 687  | 783  | 681  | 162  | 1143 | 10245                          |
| <i>Hoplobatrachus tigerinus</i>         | NC_014581.1                        | 960               | 339 | 1356 | 279  | 1824 | 483 | 1548 | 681  | 783  | 681  | 159  | 1143 | 10236                          |
| <i>Hymenochirus boettgeri</i>           | NC_015615.1                        | 966               | 342 | 1377 | 294  | 1815 | 513 | 1545 | 687  | 783  | 657  | 165  | 1140 | 10284                          |
| <i>Hyla chinensis</i>                   | NC_006403.1                        | 960               | 339 | 1362 | 300  | 1788 | 495 | 1539 | 687  | 783  | 681  | 162  | 1146 | 10242                          |
| <b><i>Dryophytes japonicus</i></b>      | NC_010232.1                        | 960               | 339 | 1362 | 300  | 1800 | 495 | 1539 | 687  | 783  | 681  | 162  | 1146 | 10254                          |
| <i>Kaloula pulchra</i>                  | NC_006405.1                        | 957               | 339 | 1359 | 282  | 1791 | 501 | 1548 | 687  | 783  | 681  | 162  | 1140 | 10230                          |
| <i>Leiopelma archeyi</i>                | NC_014691.1                        | 966               | 348 | 1377 | 294  | 1824 | 507 | 1548 | 687  | 783  | 681  | 162  | 1140 | 10317                          |
| <i>Limnonectes fujianensis</i>          | AY974191.2                         | 954               | 324 | 1365 | 282  | 1824 | 489 | 1536 | 684  | 783  | 681  | 159  | 1239 | 10320                          |
| <i>Mantella madagascariensis</i>        | NC_007888.1                        | 960               | 339 | 1362 | 279  | 1794 | 486 | 1548 | 687  | 783  | 681  | 162  | 1140 | 10221                          |
| <i>Microhyla heymonsi</i>               | NC_006406.1                        | 957               | 339 | 1359 | 282  | 1761 | 498 | 1548 | 687  | 783  | 681  | 162  | 1143 | 10200                          |
| <i>Microhyla okinavensis</i>            | NC_010233.1                        | 957               | 339 | 1362 | 282  | 1803 | 498 | 1548 | 687  | 783  | 681  | 162  | 1140 | 10242                          |
| <i>Microhyla ornata</i>                 | NC_009422.1                        | 957               | 339 | 1362 | 282  | 1791 | 501 | 1548 | 687  | 783  | 681  | 162  | 1143 | 10236                          |
| <i>Nanorana pleskei</i>                 | NC_016119.1                        | 957               | 357 | 1362 | 282  | 1821 | 495 | 1548 | 684  | 783  | 681  | 159  | 1143 | 10272                          |
| <i>Occidozyga martensii</i>             | NC_014685.1                        | 960               | 342 | 1365 | 276  | 1806 | 489 | 1545 | 687  | 783  | 681  | 159  | 1134 | 10227                          |
| <i>Odorrana ishikawae</i>               | NC_015305.1                        | 960               | 339 | 1365 | 282  | 1800 | 498 | 1548 | 687  | 783  | 675  | 165  | 1137 | 10239                          |
| <i>Amolops tormotus</i>                 | NC_009423.1                        | 960               | 309 | 1365 | 282  | 1788 | 498 | 1551 | 687  | 783  | 675  | 165  | 1143 | 10206                          |
| <i>Pelophylax chosonicus</i>            | NC_016059.1                        | 960               | 339 | 1359 | 282  | 1791 | 498 | 1536 | 687  | 783  | 681  | 162  | 1140 | 10218                          |
| <i>Pelobates cultripes</i>              | AJ871086.1                         | 972               | 342 | 1377 | 294  | 1818 | 507 | 1551 | 681  | 783  | 681  | 165  | 1140 | 10311                          |
| <b><i>Pelophylax nigromaculatus</i></b> | NC_002805.1                        | 960               | 339 | 1359 | 282  | 1794 | 498 | 1536 | 687  | 783  | 681  | 162  | 1140 | 10221                          |
| <i>Pelophylax plancyi</i>               | NC_009264.1                        | 960               | 339 | 1359 | 282  | 1794 | 498 | 1536 | 687  | 783  | 681  | 162  | 1140 | 10221                          |

|                                         |             |     |     |             |     |      |            |             |            |            |            |     |             |       |
|-----------------------------------------|-------------|-----|-----|-------------|-----|------|------------|-------------|------------|------------|------------|-----|-------------|-------|
| <i>Pipa carvalhoi</i>                   | NC_015617.1 | 963 | 342 | 1377        | 294 | 1809 | 510        | 1548        | 687        | 783        | 681        | 165 | 1140        | 10299 |
| <i>Pipa pipa</i>                        | GQ244477.1  | 963 | 342 | 1377        | 294 | 1809 | 504        | 1545        | 687        | 783        | 681        | 165 | 1140        | 10290 |
| <i>Pseudhymenochirus merlini</i>        | NC_015618.1 | 963 | 342 | 1374        | 294 | 1809 | 516        | 1545        | 684        | 783        | 681        | 165 | 1137        | 10293 |
| <i>Quasipaa spinosa</i>                 | NC_013270.1 | 954 | 339 | 1362        | 282 | 1821 | 495        | 1548        | 684        | 783        | 681        | 159 | 1143        | 10251 |
| <i>Rana adenopleura</i>                 | JX033120.1  | 960 | 339 | 1362        | 282 | 1797 | 498        | 1548        | 687        | 783        | 675        | 162 | 1140        | 10233 |
| <i>Lithobates catesbeianus</i>          | KF049927.1  | 960 | 339 | 1359        | 282 | 1809 | 498        | 1551        | 687        | 783        | 678        | 159 | 1140        | 10245 |
| <i>Rana kunyuensis</i>                  | KF840516.1  | 957 | 339 | 1359        | 282 | 1809 | 492        | 1551        | 684        | 783        | 681        | 159 | 1140        | 10236 |
| <i>Rana dybowskii</i>                   | KF898355.1  | 957 | 339 | 1359        | 282 | 1791 | 492        | 1548        | 687        | 783        | 681        | 159 | 1140        | 10218 |
| <i>Rana sylvatica</i>                   | KP222281.1  | 960 | 339 | 1359        | 282 | 1791 | 498        | 1551        | 687        | 783        | 681        | 159 | 1140        | 10230 |
| <i>Rhinophrynus dorsalis</i>            | NC_015620.1 | 963 | 342 | 1377        | 294 | 1821 | 507        | 1551        | 687        | 783        | 681        | 165 | 1140        | 10311 |
| <i>Rhacophorus schlegelii</i>           | NC_007178.1 | 960 | 342 | 1362        | 282 | 1794 | 486        | 1551        | 681        | 783        | 621        | 162 | 1143        | 10167 |
| <i>Xenopus laevis</i>                   | NC_001573.1 | 969 | 342 | 1383        | 294 | 1812 | 510        | 1554        | 687        | 780        | 678        | 165 | 1137        | 10311 |
| <i>Xenopus tropicalis</i>               | NC_006839.1 | 966 | 342 | 1377        | 294 | 1815 | 516        | 1554        | 687        | 783        | 681        | 165 | 1140        | 10320 |
| <b>PRESENT STUDY:</b>                   |             |     |     |             |     |      |            |             |            |            |            |     |             |       |
| <b><i>Bufo japonicus</i></b>            |             | 969 | 342 | 1374        | 300 | 1798 | 495        | 1555        | 688        | 786        | 684        | 165 | 1143        | 10299 |
| <i>Fejervarya kawamurai</i>             |             | 960 | 342 | 1362        | 279 | 1820 | <b>363</b> | 1548        | 682        | 786        | 684        | 165 | 1139        | 10130 |
| <b><i>Hyla japonica</i></b>             |             | 969 | 339 | 1374        | 303 | 1812 | 498        | 1554        | 688        | 786        | 684        | 165 | 1143        | 10315 |
| <b><i>Glandirana rugosa</i></b>         |             | 966 | 342 | 1370        | 285 | 1798 | 498        | 1558        | <b>495</b> | <b>626</b> | 684        | 165 | <b>1036</b> | 9823  |
| <i>Rana japonica</i>                    |             | 966 | 342 | 1368        | 294 | 1789 | 495        | 1557        | <b>572</b> | 772        | 684        | 165 | <b>705</b>  | 9709  |
| <i>Rana ornativentris</i>               |             | 966 | 342 | 1368        | 294 | 1800 | 495        | 1551        | 688        | 786        | <b>524</b> | 165 | 1143        | 10122 |
| <i>Rana tagoi tagoi</i>                 |             | 966 | 342 | 1364        | 294 | 1792 | 495        | 1557        | <b>657</b> | 786        | 684        | 165 | 1143        | 10245 |
| <b><i>Pelophylax nigromaculatus</i></b> |             | 966 | 342 | <b>1345</b> | 285 | 1792 | 501        | <b>1040</b> | 688        | 786        | 684        | 165 | 1142        | 9736  |
| <i>Pelophylax porosa</i>                |             | 969 | 342 | 1353        | 300 | 1798 | 495        | 1554        | 688        | 786        | 684        | 165 | 1143        | 10277 |
| <i>Buergeria buergeri</i>               |             | 960 | 342 | 1369        | 285 | 1800 | 492        | 1557        | 688        | 786        | 684        | 165 | 1143        | 10271 |
| <i>Buergeria japonica</i>               |             | 960 | 342 | 1372        | 279 | 1789 | 492        | 1525        | 688        | 786        | <b>606</b> | 165 | 1141        | 10145 |

Species names in bold indicate overlap between publically available mitochondrial genome sequences and the present study. Nucleotide lengths in bold indicate incompletely mapped genes from our transcriptome data.



**Table S6.** Chi-square analyses of MHC class I supertypes and assumed/reported Bd susceptibility.

| Observed no. of alleles |                  |          |           |       |
|-------------------------|------------------|----------|-----------|-------|
| MHC-I                   |                  |          |           |       |
| supertype               | Susceptible      | Tolerant | Resistant | Total |
| ST-A                    | 11               | 32       | 35        | 78    |
| ST-B                    | 7                | 19       | 100       | 126   |
| ST-C                    | 0                | 5        | 0         | 5     |
| ST-D                    | 0                | 13       | 56        | 69    |
| Total                   | 18               | 69       | 191       | 278   |
| Expected no. of alleles |                  |          |           |       |
| MHC-I                   |                  |          |           |       |
| supertype               | Susceptible      | Tolerant | Resistant | Total |
| ST-A                    | 5.05             | 19.36    | 53.59     | 78    |
| ST-B                    | 8.16             | 31.27    | 86.57     | 126   |
| ST-C                    | 0.32             | 1.24     | 3.44      | 5     |
| ST-D                    | 4.47             | 17.13    | 47.41     | 69    |
| Total                   | 18               | 69       | 191       | 278   |
| <b>Chisq p-value</b>    | <b>3.044E-09</b> |          |           |       |
